# Supplementary material for: Cholesterol moieties as building blocks for assembling nanoparticles to achieve effective oral delivery of insulin
Source: Royal Society of Chemistry journal article supplement (doi:10.1039/d0bm00577k), 2020-01-01
Supplement: d0bm00577k1.pdf [file d0bm00577k1.pdf]

**Supporting Information for:**

**Cholesterol moieties as building blocks for assembling nanoparticles to achieve effective oral delivery of insulin**

Yu Ding, Qiaochu Wang, Guangqu Liu, Yaqian Feng, Wei Zhou\*

Department of Pharmaceutics, China Pharmaceutical University, Nanjing, Jiangsu, 211198, P.R. China

\*Corresponding authors: E-mail: zw\_why@cpu.edu.cn



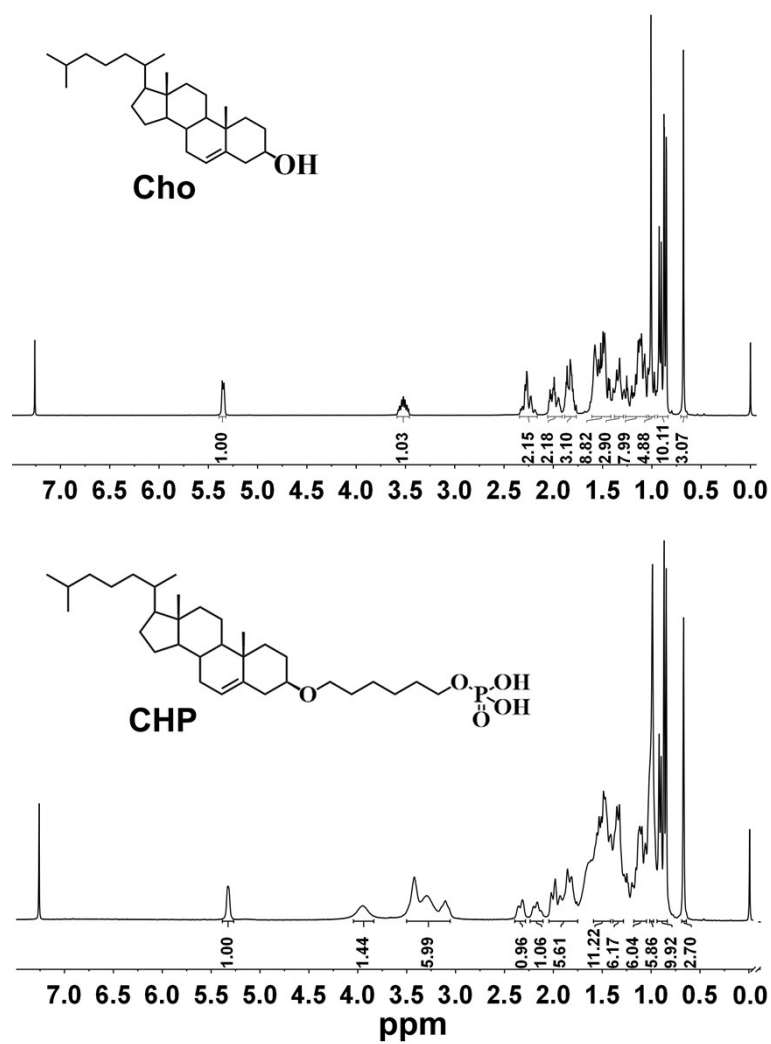

**Figure S3.**  $^1\text{H}$  NMR spectra of Cho and CHP.

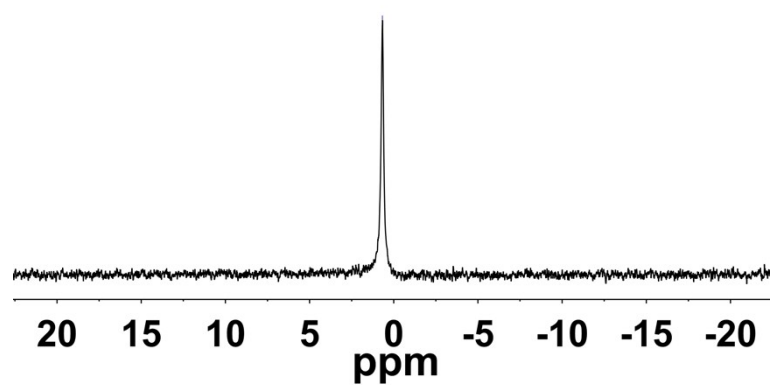

**Figure S4.** The  $^{31}\text{P}$  NMR spectrum of CHP.

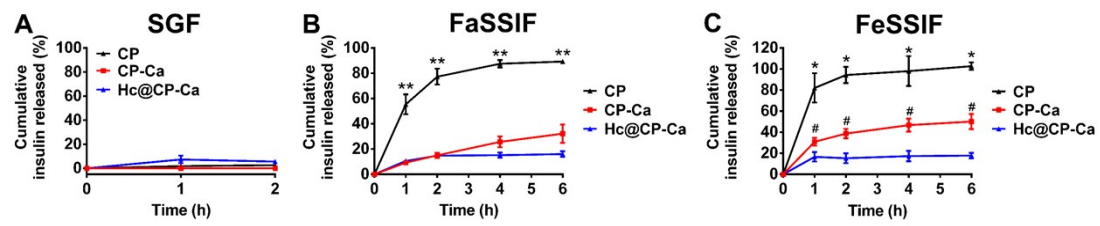

**Figure S5.** (A) The release profiles of insulin from CP NPs, CP-Ca NPs and Hc@CP-Ca NPs in SGF; (B) The release profiles of insulin from CP NPs, CP-Ca NPs and Hc@CP-Ca NPs in FaSSIF (\*\* $p < 0.01$ , versus CP-Ca NPs); (C) The release profiles of insulin from CP NPs, CP-Ca NPs and Hc@CP-Ca NPs in FeSSIF (\* $p < 0.05$ , versus CP-Ca NPs, # $p < 0.05$ , versus Hc@CP-Ca NPs). (mean  $\pm$  SD,  $n = 3$ )
